# Supplementary material for: Protective Effects of Whey Protein Hydrolysate, Treadmill Exercise, and Their Combination against Scopolamine-Induced Cognitive Deficit in Mice
Source: MDPI journal article supplement (doi:10.3390/foods12244428), 2023-12-10
Supplement: s1 [file s1]

## Supplementary Material

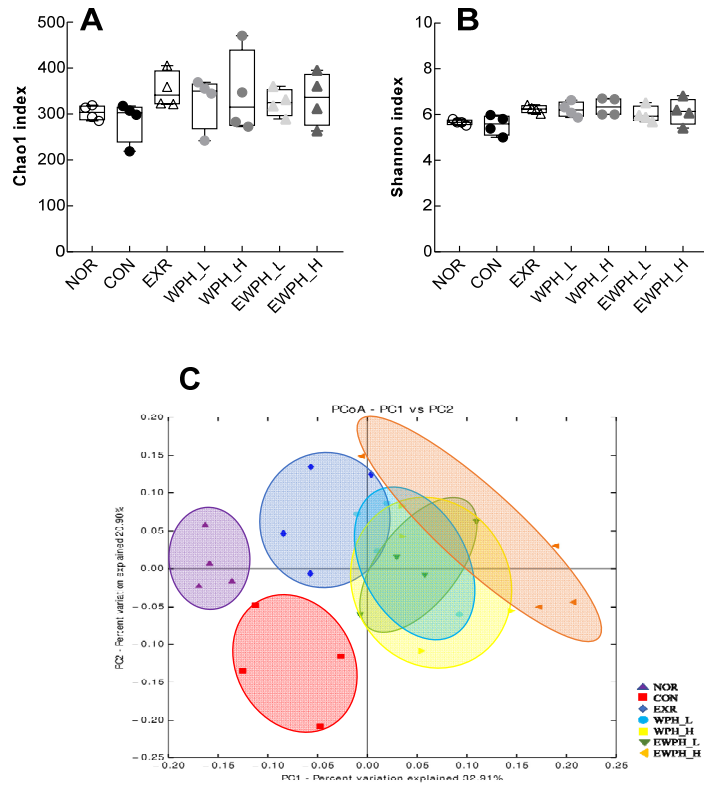

**Supplementary Figure S1. (A–C) Effect of WPH and treadmill exercise on gut microbiome diversity.** NOR, normal; CON, control; EXR, exercise; WPH-L/H, low-dose/high-dose whey protein hydrolysate; EWP\_H\_L/H, exercise + low-dose/high-dose whey protein hydrolysate

## A. Class & Order

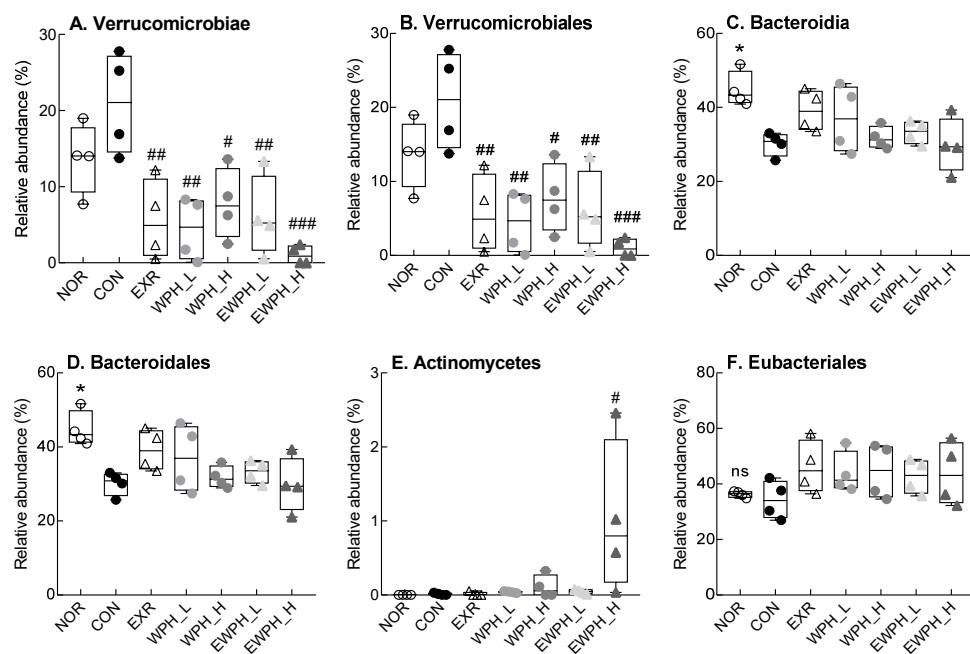

## B. Family

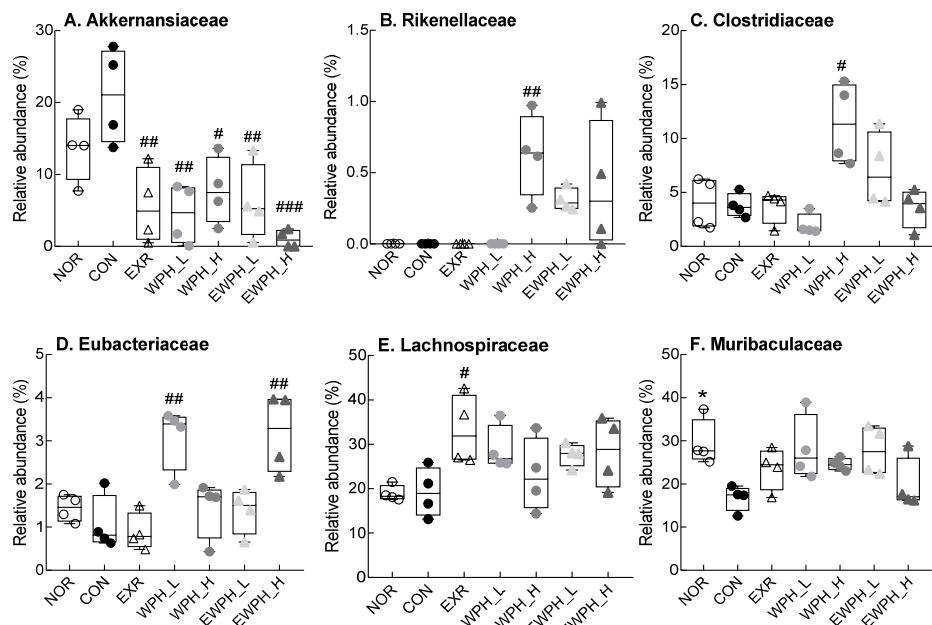

**Supplementary Figure S2. Effect of WPH and treadmill exercise on the gut microbiome composition at the (A) class & order and (B) family level.** NOR, normal; CON, control; EXR, exercise; WPH-L/H, low-dose/high-dose whey protein hydrolysate; EWPH\_L/H, exercise + low-dose/high-dose whey protein hydrolysate.
